# Supplementary material for: CT Image-Based Biopsy to Aid Prediction of HOPX Expression Status and Prognosis for Non-Small Cell Lung Cancer Patients
Source: MDPI journal article supplement (doi:10.3390/cancers15082220), 2023-04-10

## Supplementary Materials

**Table S1** Case IDs of patients used in the training dataset

| Training dataset (n=92), Case IDs |         |         |         |         |         |         |         |
|-----------------------------------|---------|---------|---------|---------|---------|---------|---------|
| R01-004                           | R01-027 | R01-048 | R01-064 | R01-080 | R01-104 | R01-120 | R01-136 |
| R01-006                           | R01-028 | R01-049 | R01-065 | R01-083 | R01-105 | R01-122 | R01-137 |
| R01-007                           | R01-029 | R01-051 | R01-066 | R01-084 | R01-107 | R01-123 | R01-138 |
| R01-012                           | R01-031 | R01-052 | R01-067 | R01-091 | R01-108 | R01-124 | R01-139 |
| R01-013                           | R01-032 | R01-054 | R01-068 | R01-093 | R01-110 | R01-126 | R01-140 |
| R01-014                           | R01-037 | R01-055 | R01-069 | R01-094 | R01-111 | R01-127 | R01-141 |
| R01-016                           | R01-039 | R01-057 | R01-072 | R01-097 | R01-112 | R01-128 | R01-144 |
| R01-017                           | R01-040 | R01-059 | R01-073 | R01-098 | R01-113 | R01-129 | R01-146 |
| R01-018                           | R01-041 | R01-060 | R01-076 | R01-099 | R01-115 | R01-131 |         |
| R01-021                           | R01-042 | R01-061 | R01-077 | R01-100 | R01-116 | R01-132 |         |
| R01-022                           | R01-043 | R01-062 | R01-078 | R01-101 | R01-117 | R01-133 |         |
| R01-023                           | R01-046 | R01-063 | R01-079 | R01-103 | R01-118 | R01-134 |         |

**Table S2** Case IDs of patients used in the test dataset

| Test dataset (n=24), Case IDs |         |         |         |         |         |         |         |
|-------------------------------|---------|---------|---------|---------|---------|---------|---------|
| R01-003                       | R01-024 | R01-034 | R01-056 | R01-089 | R01-106 | R01-121 | R01-135 |
| R01-005                       | R01-026 | R01-035 | R01-071 | R01-096 | R01-109 | R01-125 | R01-142 |
| R01-015                       | R01-033 | R01-038 | R01-081 | R01-102 | R01-114 | R01-130 | R01-145 |

**Figure S1** Calculation procedure of spearman coefficients to find the significant gene. The data distribution was analyzed by a quantile-quantile plot and chi-squared test. Spearman coefficients were computed for all combinations between 10674 gene expression data and 1218 image features derived from computed tomography (CT) in the training dataset (n=92). The combinations of image feature and gene with spearman coefficients greater than 0.5 were considered to be correlated with each other. Among all selected genes, HOPX gene showed highest coefficients with all selected image features, which is the significant gene studied in this paper.

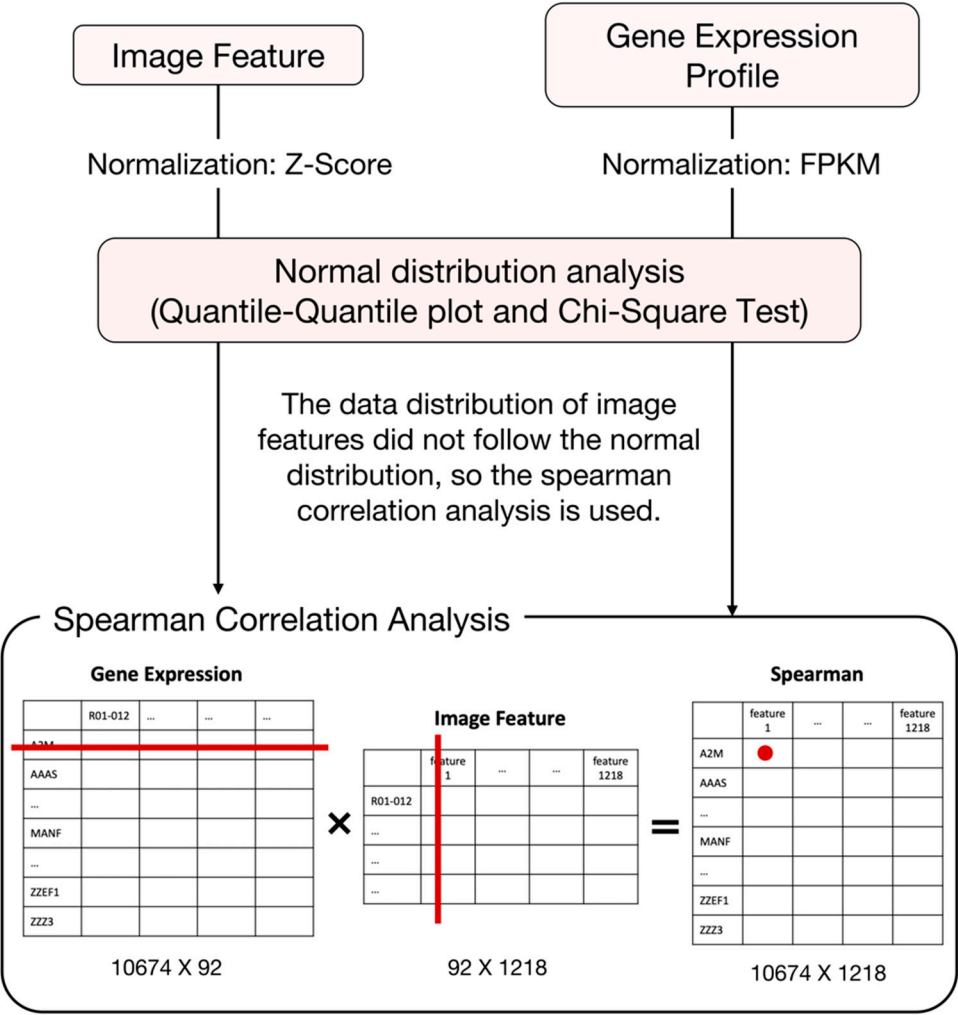

**Figure S2** The data distribution analysis in a Quantile-Quantile plot with the p-value (Shapiro-Wilks test) of the final radiogenomic signature, consisting of two image features (“original\_firstorder\_Skewness” and “wavelet-LLL\_firstorder\_RootMeanSquared”). The data distribution of these two image features showed significant differences between the normal distribution ( $p=0.032$  and  $p=0.003$ , respectively).

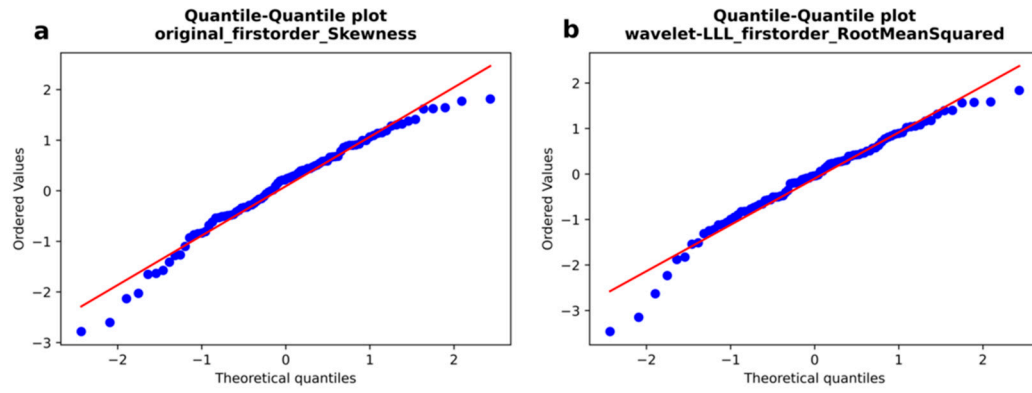

**FigureS3** The entire heatmap for Spearman correlation analysis

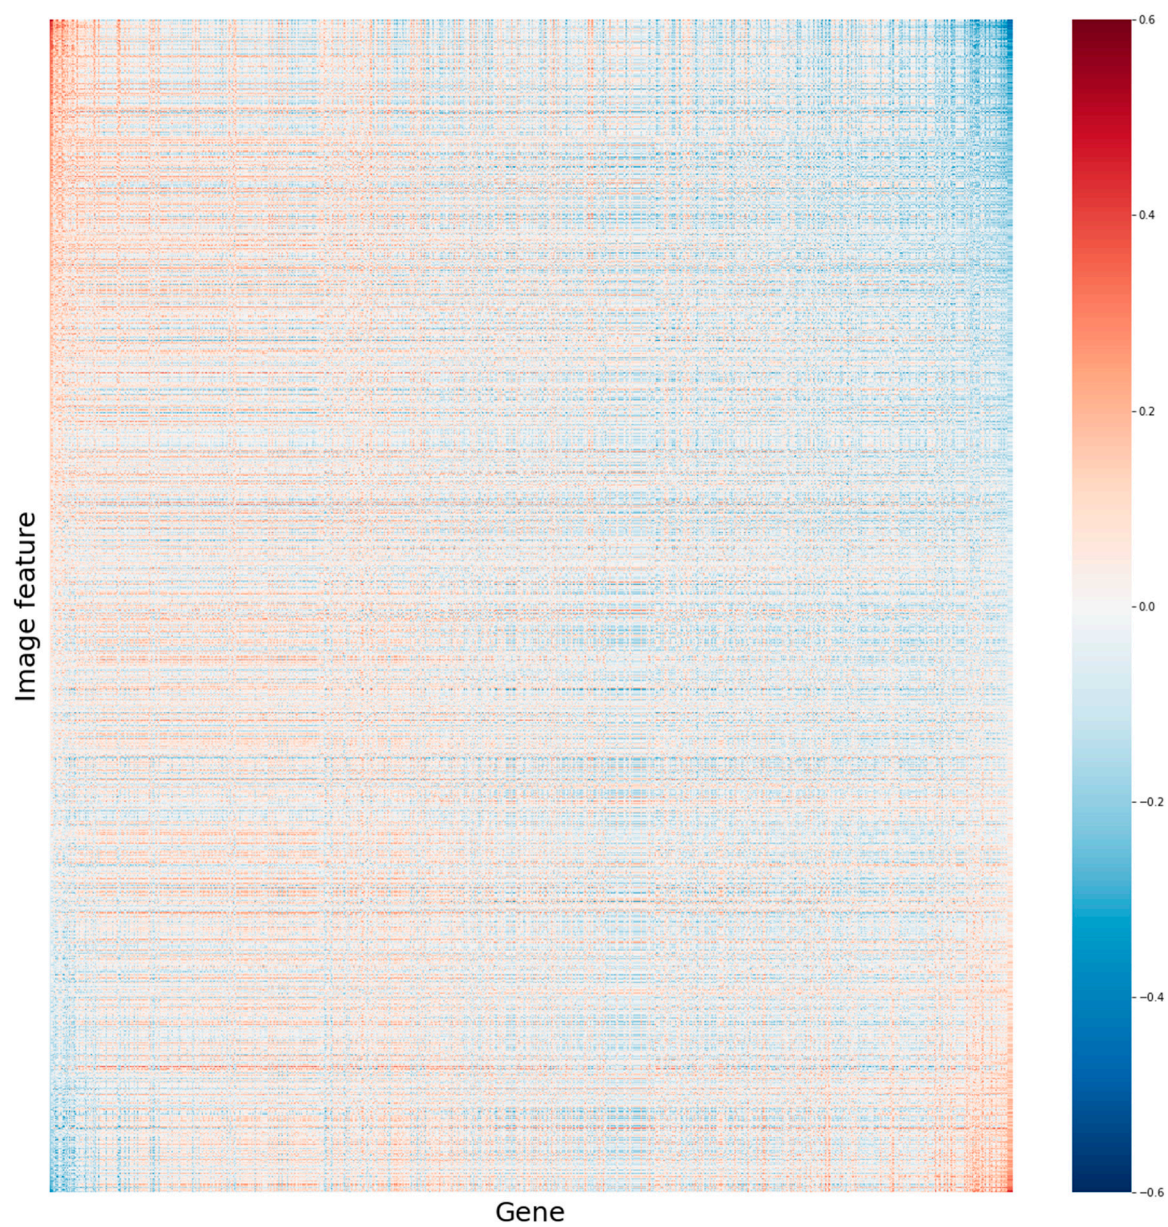

Supplement: s1 [file s1]
